# Supplementary material for: Predictive value of angiogenesis-related gene profiling in patients with HER2-negative metastatic breast cancer treated with bevacizumab and weekly paclitaxel
Source: PubMed Central journal article supplement (PMC5029696; doi:10.18632/oncotarget.8128), 2016-03-16
Supplement: oncotarget-07-24217-s001.pdf [file oncotarget-07-24217-s001.pdf]

## SUPPLEMENTARY TABLE

**Supplementary Table S1: Gene list, HR (95% IC) and p values for univariate analysis**

See Supplementary File 1
